# Supplementary material for: An amphiphilic non-viral gene vector prepared by a combination of enzymatic atom transfer radical polymerization and enzymatic ring-opening polymerization
Source: Royal Society of Chemistry journal article supplement (doi:10.1039/c6ra28650j), 2017-01-01
Supplement: c6ra28650j1.pdf [file c6ra28650j1.pdf]

## Supporting Information

### Amphiphilic non-viral gene vector prepared by combination of enzymatic Atom Transfer Radical Polymerization and enzymatic Ring-Opening Polymerization

Xinghuo Wang<sup>†</sup>, Wenjing Yun<sup>‡</sup>, Wei Jiang<sup>†</sup>, Ding Wang<sup>‡</sup>, Jun Tang<sup>†</sup> and Ling Zhang<sup>‡</sup>

<sup>†</sup>Department of Polymer Science, Chemistry College, Jilin University, Changchun 130012, People's Republic of China.

<sup>‡</sup>Department of Pathophysiology, Basic Medical College, Jilin University, Changchun 130021, People's Republic of China.

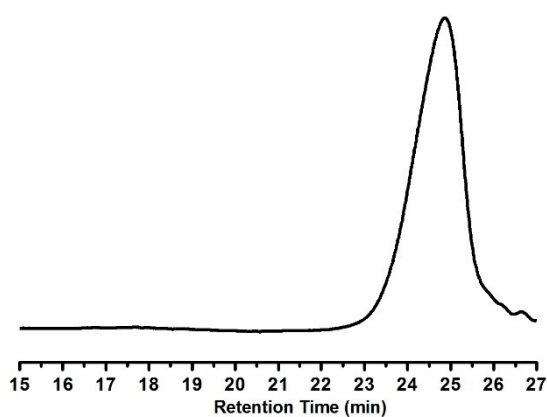

Fig. S1. GPC trace of PCL-Br obtained by Novozym 435 catalyzed.

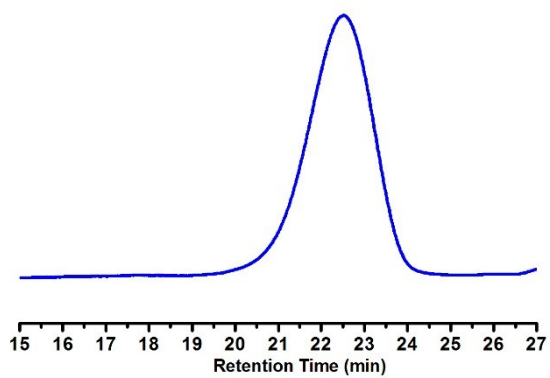

**Fig. S2.** GPC trace of PCL-b-PGEA<sub>60</sub> obtained by DhHP-6 catalyzed.

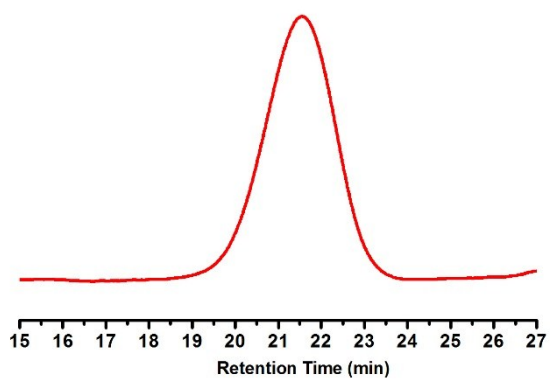

**Fig. S3.** GPC trace of PCL-b-PGEA<sub>142</sub> obtained by DhHP-6 catalyzed.

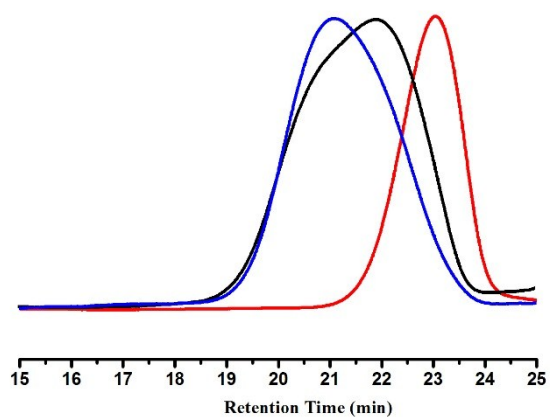

**Fig. S4.** GPC traces of DhHP-6 catalyzed polymerization of GMA initiated by PCL-Br under AGET ATRP.

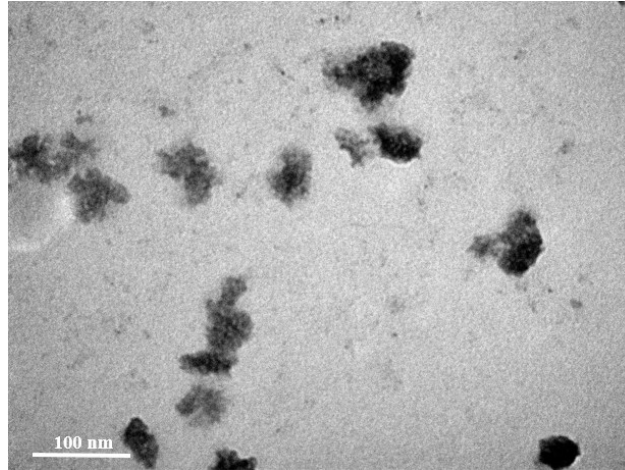

**Fig. S5.** TEM image of PCL-b-PGEA<sub>142</sub> at w/w=10.

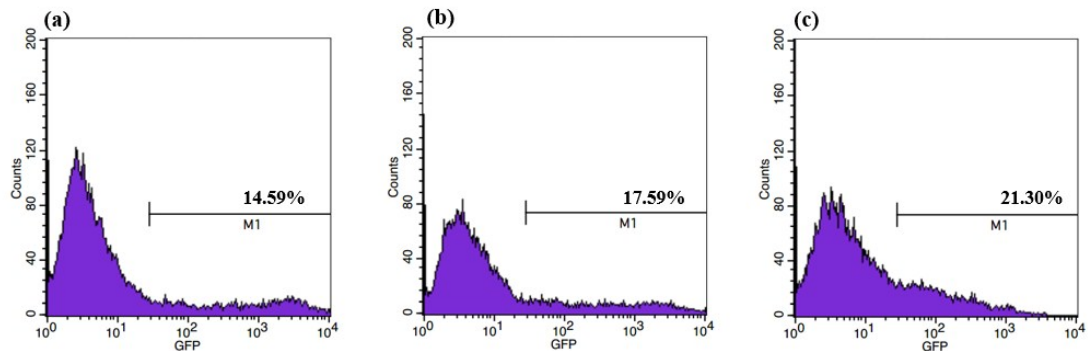

**Fig. S6.** Flow cytometry analysis plot of (a) PCL-b-PGEA<sub>60</sub> (b) PCL-b-PGEA<sub>142</sub> (c) PEI 25kDa
